# Supplementary material
Source: HighWire-hosted journal article supplement (http://www.ajevonline.org/highwire/filestream/1928/field_highwire_adjunct_files/4/Supplemental_Table_2.pdf)
Supplement: Supplemental_Table_2.pdf [file Supplemental_Table_2.pdf]

**Supplemental Data for:**

Campisano, A., M. Pancher, G. Puopolo, A. Puddu, S. Lòpez-Fernàndez, B. Biagini, S. Yousaf, and I. Pertot. 2015. Diversity in endophyte populations reveals functional and taxonomic diversity between wild and domesticated grapevines. *Am. J. Enol. Vitic.* 66:12-20. doi: 10.5344/ajev.2014.14046.

**Supplemental Table 2** Bonferroni-corrected *p* values of one-way ANOSIM analysis of distances among groups, according to phenotypic tests. (a) All traits, (b) PGP traits, (c) QS traits, and (d) BiCo traits.

Bonferroni-corrected *p* values of one-way ANOSIM test.

|   |        |        |             |
|---|--------|--------|-------------|
|   | D      | W      |             |
| D |        | 0.0001 | (a)         |
| W | 0.0001 |        | all traits  |
|   | D      | W      |             |
| D |        | 0.0006 | (b)         |
| W | 0.0006 |        | PGP traits  |
|   | D      | W      |             |
| D |        | 0.0001 | (c)         |
| W | 0.0001 |        | QS traits   |
|   | D      | W      |             |
| D |        | 0.0001 | (d)         |
| W | 0.0001 |        | BiCo traits |

D: domestic grapevine endophytes  
W: wild grapevine endophytes
